# Supplementary material for: Controlled hybridization of Sn–SnO2 nanoparticles via simple-programmed microfluidic processes for tunable ultraviolet and blue emissions
Source: Royal Society of Chemistry journal article supplement (doi:10.1039/c4tc00842a), 2014-01-01
Supplement: c4tc00842a1.pdf [file c4tc00842a1.pdf]

## Supplementary Materials for

### **Controlled Hybridization of Sn-SnO<sub>2</sub> Nanoparticles *via* Simple-Programmed Microfluidic Processes for Tunable Ultraviolet and Blue Emissions**

Shuai Li,<sup>1§</sup> Xiaodi Zhong,<sup>1§</sup> Yujun Song,<sup>2\*, 1</sup> Jianguang Sun,<sup>1</sup> Xiaomiao Shen,<sup>1</sup> Yuanjun Song,<sup>3</sup> Rongming Wang,<sup>2\*, 3</sup> Min Zhu,<sup>4</sup> Haizheng Zhong<sup>4</sup> and Aiguo Zheng<sup>5</sup>

<sup>1</sup>School of Materials Science and Engineering, Beihang University, Beijing 100191, China; <sup>2</sup>School of Mathematics and Physics, University of Science and Technology Beijing, Beijing 100083, China; <sup>3</sup>Department of Physics, Beihang University, Beijing 100191, China; <sup>4</sup>School of Materials Sciences and Engineering, Beijing Institute of Technology, Beijing 100181, China; <sup>5</sup>Institute of Petroleum Science and Technology of China, Beijing 100088, China

Correspondence and requests for materials should be addressed to Y.S.: [songyj@ustb.edu.cn](mailto:songyj@ustb.edu.cn); R.W.: [rmwang@ustb.edu.cn](mailto:rmwang@ustb.edu.cn)

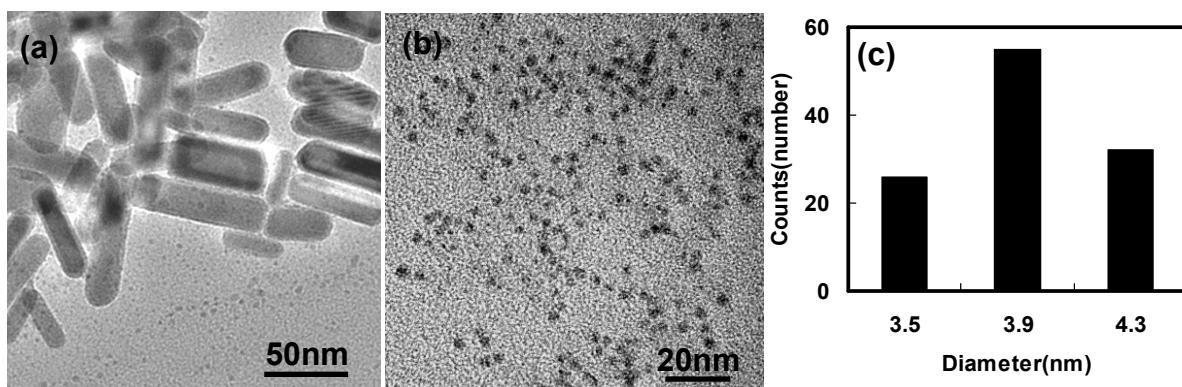

**Figure s1** (a) TEM images of the mixed nanorods and nanospheres as synthesized at  $27.5 \pm 2.5^\circ\text{C}$  only using PVP as stabilizer before separating nanorods and nanospheres by centrifugal; (b) TEM images and (c) the size histogram of nanospheres obtained from the supernatant of the as-synthesized nanoparticle solution by centrifugal (10000-12000rpm, 30 min). The supernatant is the top solution after releasing most of the nanorods by centrifugal (8000-10000 rpm, 30 min).

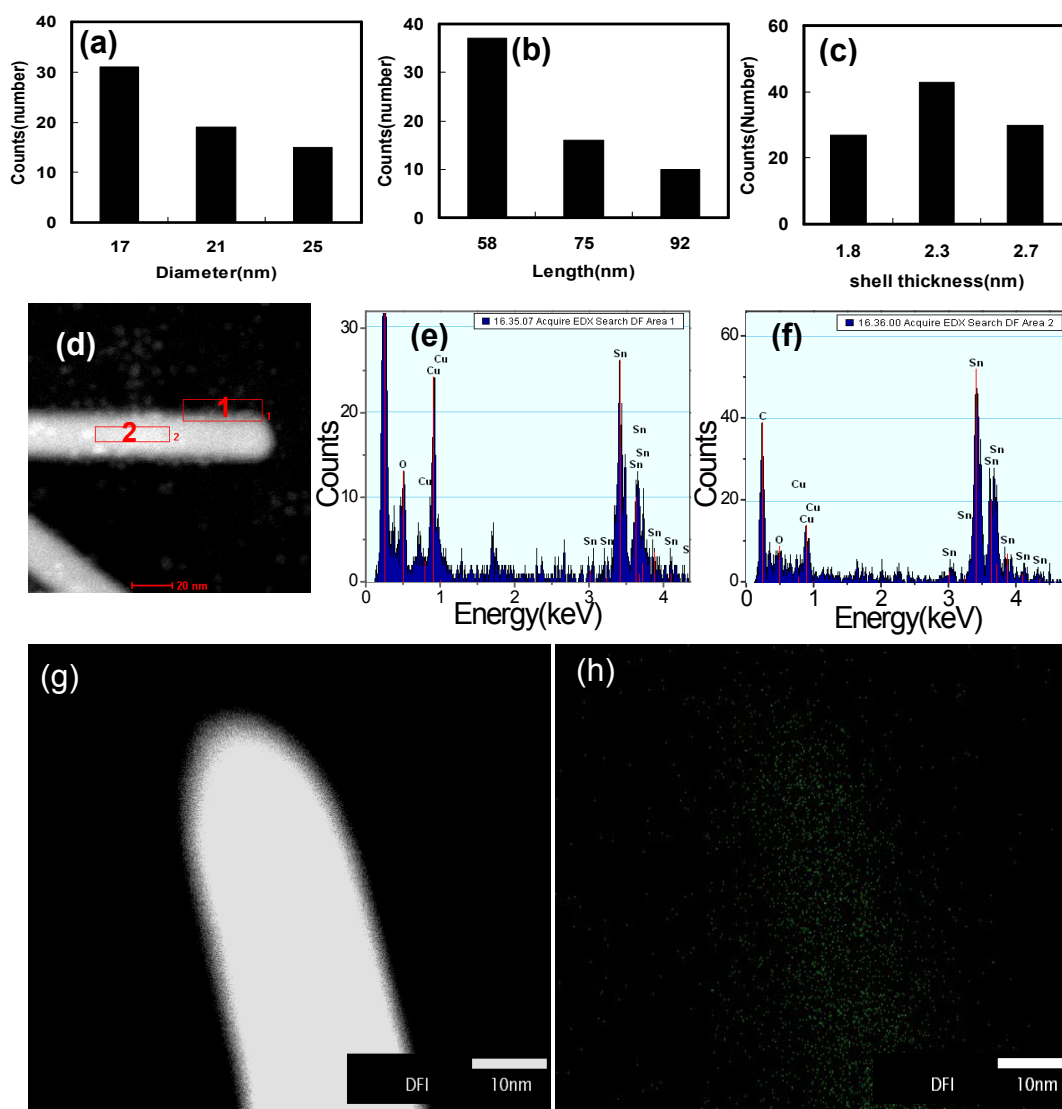

**Figure s2** Histograms of diameter (a), length (b) and shell thickness (c) of Sn@SnO<sub>2</sub> nanorods; STEM image (d) of one typical Sn@SnO<sub>2</sub> nanorod and EDX spectra at its core (e) and shell (f); STEM image of another Sn@SnO<sub>2</sub> nanorod (g) and its tin distribution mapping (Sn L) (h).

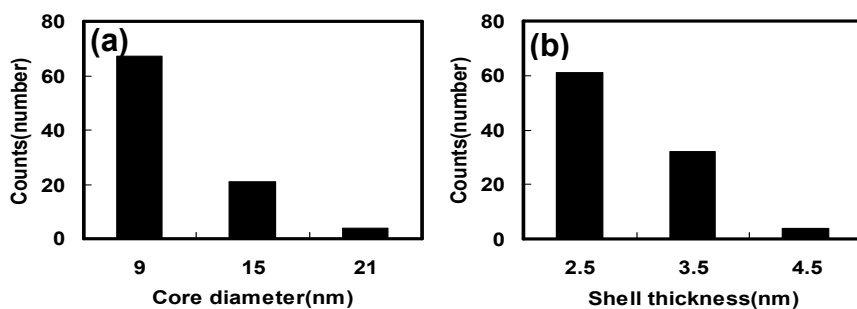

**Figure s3** Histograms of core (a) and shell (b) diameters of the Sn@SnO<sub>2</sub> nanospheres (core:  $11.0 \pm 3.1$  nm; shell:  $2.8 \pm 0.4$  nm) synthesized at  $82.5 \pm 2.5^\circ\text{C}$  only using PVP as stabilizer.

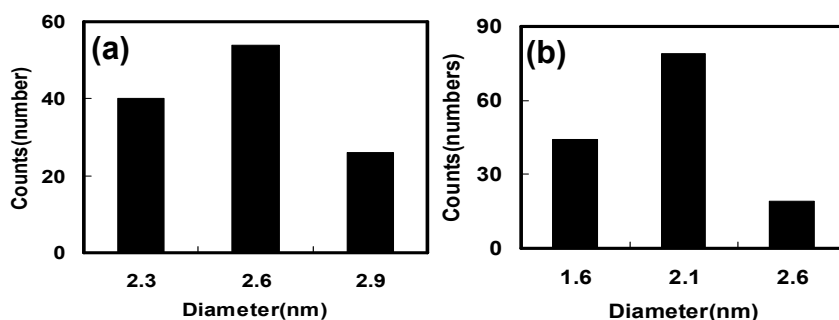

**Figure s4** Diameter histogram of (a) 2.6 nm Sn-SnO<sub>2</sub> nanospheres ( $2.6 \pm 0.2$  nm) synthesized at  $82.5 \pm 2.5^\circ\text{C}$  and collected at  $27.5 \pm 2.5^\circ\text{C}$  using MAH and TSC as co-stabilizers; (b) 2.1 nm Sn-SnO<sub>2</sub> nanospheres ( $2.1 \pm 0.3$  nm) synthesized at  $80^\circ\text{C}$  and collected at  $2^\circ\text{C}$  using PVP, MAH and TSC as complex surfactants (stabilizer).

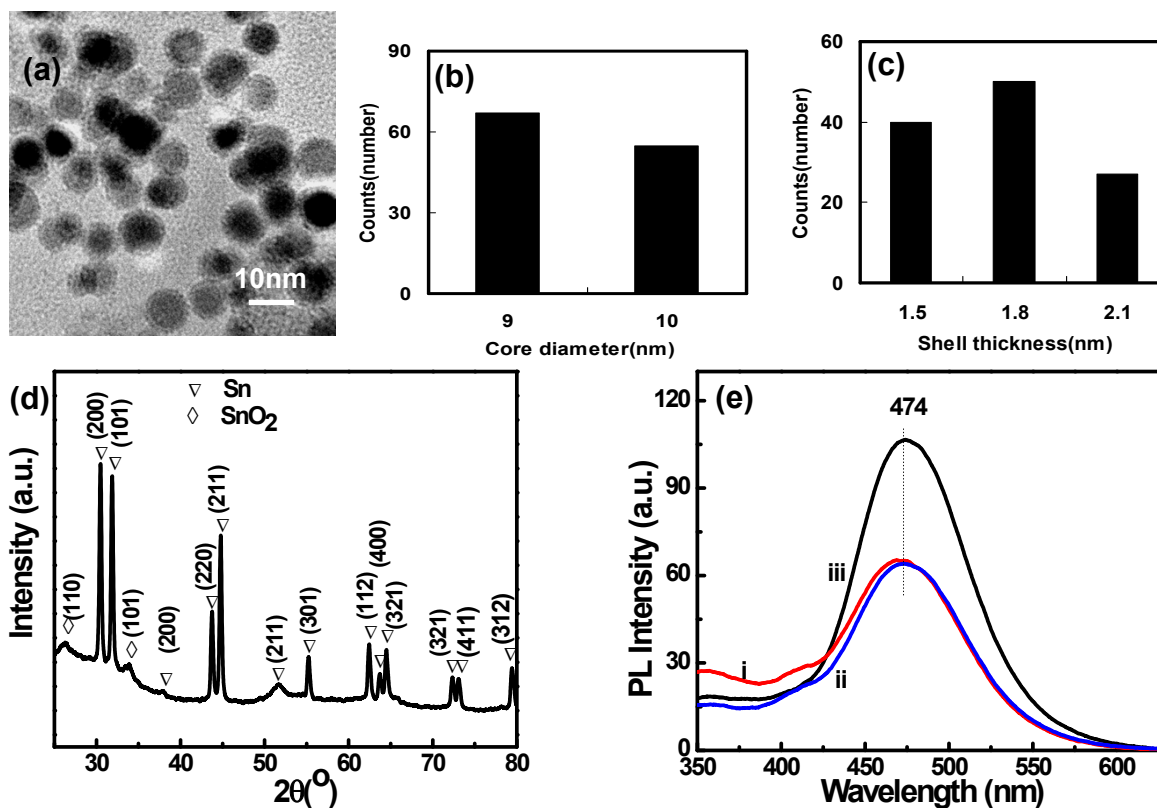

**Figure s5** TEM image (a), histograms of core diameter (b) and shell thickness (c), XRD (d) and photoluminescence (e) of Sn@SnO<sub>2</sub> nanospheres (core:  $9.8 \pm 1.1$ ; shell:  $1.8 \pm 0.2$ ) (i) formed by annealing of 2.08 nm Sn-SnO<sub>2</sub> nanohybrids solution for more than 2 hours at  $\sim 90^\circ\text{C}$  by comparing with 13.8 nm Sn@SnO<sub>2</sub> nanospheres with amorphous shells (ii) and 2.1 nm Sn-SnO<sub>2</sub> with disordered SnO<sub>2</sub> component (iii).
